# Supplementary material for: The present-day stress field along the Northwest Pacific Wadati-Benioff zone constrained by focal mechanisms of moderate earthquakes
Source: Frontiers journal article supplement (doi:10.3389/feart.2022.1017632), 2023-01-12
Supplement: Table_1.XLSX [file Table_1.XLSX]

## Sheet: Southern Kurile Trench WBZ
Southern Kurile Trench WBZ
Shallow Depths (0-70 km) subvolum:Ra1
Number	Longitude(°)	Latitude(°)	Magnitude(Mw)	Depth(km)	Strike(°)	Dip(°)	Rake(°)
1	144.474	42.0159	5.7	15	337	69	55
5	144.486	42.0692	4.3	8	352	80	86
6	144.455	42.0438	4.2	10	258	35	-178
9	144.279	42.001	4.6	12	292	63	22
10	144.345	42.1519	4.6	28	29	74	113
11	143.98	42.0942	4.3	16	241	87	170
14	144.368	42.2594	4.7	50	169	71	48
15	144.381	42.0442	4	14	247	81	-152
16	144.298	42.3257	4.6	28	176	66	49
18	144.414	42.2198	4.3	20	65	75	109
19	143.849	42.602	4.9	65	127	87	98
20	144.292	42.3311	4.2	18	63	62	133
21	144.033	42.1059	4.4	8	212	38	149
22	143.766	42.431	4.5	60	287	86	-107
23	143.244	42.4632	4.8	58	74	74	121
24	143.582	42.4524	4.2	58	317	87	-72
Intermediate Depths (70-200 km) subvolum:Ra2
26	142.956	42.6509	4.4	85	69	32	172
29	143.413	42.7934	4.2	80	175	61	50
31	143.285	43.0606	4.5	105	14	87	-93
32	142.612	43.1475	4.3	140	138	20	-124
33	142.617	43.5624	5.5	160	64	49	176
36	141.975	43.7845	4.1	200	158	25	-84
46	143.298	43.0532	4.5	95	90	3	159
79	142.685	43.4778	5.4	155	63	53	175
Intermediate Depths (70-200 km) subvolum:Ra3
25	143.629	42.1518	4.8	72	293	85	-63
27	143.714	42.2675	4.3	90	252	3	43
28	143.942	42.4288	5.6	100	85	12	-90
30	143.302	42.3939	4.5	85	121	4	-68
34	142.37	43.2418	4.1	140	126	51	-21
35	142.317	43.3096	4.5	170	107	84	43
50	144.326	42.7395	4.4	98	265	63	-92
62	143.236	42.6892	5.9	116	278	87	-89
69	143.32	43.056	4.4	125	96	87	82
Intermediate Depths (200-300 km) subvolum:Ra4
2	140.961	44.3599	4.4	280	75	57	-163
3	141.131	44.4232	4.3	290	193	53	10
4	141.344	44.4346	4	240	173	50	-32
37	141.832	43.8763	4.2	240	149	35	18
38	141.975	43.8986	4.2	260	218	20	-8
39	141.21	44.1564	4.1	250	161	25	-82
40	140.911	44.4726	4.7	280	300	60	-116
41	140.977	44.5128	4.3	290	302	69	-116
36	141.975	43.7845	4.1	200	158	25	-84
Note: The rows marked yellow are the example of moment tensor inversions given in the paper

## Sheet: Central Japan Trench WBZ
Central Japan Trench WBZ
The trench-outer rise subvolum:Rb0
Number	Longitude(°)	Latitude(°)	Magnitude(Mw)	Depth(km)	Strike(°)	Dip(°)	Rake(°)
1	144.439	37.8229	4.6	5	188	53	-106
2	144.729	38.0576	4.4	5	17	27	-86
3	144.023	38.2993	4.4	5	218	54	-64
4	144.569	38.0777	4.4	5	342	22	-81
5	144.362	37.765	4	5	160	62	-105
6	144.505	37.6364	5	5	212	49	-90
7	144.89	38.0555	5.8	5	35	38	-99
8	144.679	37.8446	4.6	8	2	38	-91
9	144.083	37.9004	4.4	8	345	47	-138
10	143.336	38.2917	5	14	258	82	120
12	144.042	37.8842	5.5	23	176	47	-129
15	144.916	37.633	4.3	32	108	45	-138
Shallow Depths (0-70 km) subvolum:Rb1
11	142.283	38.84	4.3	23	331	16	-79
13	142.284	38.9742	4.6	29	280	8	-134
14	142.463	39.0221	4.6	29	193	60	-103
16	142.097	38.7422	4.9	38	194	17	98
17	142.258	38.7647	4.6	38	178	16	70
18	142.376	38.6617	5	38	209	14	85
19	142.183	39.0132	4	41	185	84	-98
20	142.283	38.5427	4.8	41	202	21	89
21	142.668	38.5684	4.5	41	80	3	-52
22	142.333	38.6598	4.6	41	8	73	87
23	142.822	38.6809	4.5	41	197	13	84
24	142.473	38.6852	4.9	41	193	24	68
25	142.275	38.6964	4.5	41	193	27	112
26	142.107	38.6973	4.3	42	28	65	78
27	142.206	38.6369	4.7	44	15	65	94
28	142.323	38.7342	4.6	44	186	21	68
29	142.231	38.7348	4.8	44	184	22	72
30	142.387	38.5405	4.1	44	219	24	87
31	142.334	38.6159	4.1	44	185	22	66
32	142.928	38.6042	4.1	44	227	12	126
33	142.51	38.896	4.6	44	225	62	66
34	142.103	39.1324	4.2	44	183	20	76
35	142.102	38.7988	4.5	44	161	17	53
36	142.143	38.7836	4.8	44	199	22	84
37	142.245	38.8359	4.5	44	22	69	104
38	141.986	38.8776	4.4	44	185	23	71
39	142.211	38.8694	4.5	44	186	17	74
40	142.083	38.8489	4.5	44	208	22	95
41	142.447	38.6824	4.6	44	19	67	89
42	142.354	38.8729	4.4	44	198	24	94
43	141.975	39.0024	4.4	44	19	67	97
44	142.025	38.9776	4.3	44	198	67	62
45	142.036	39.179	4.2	47	185	21	77
46	142.248	39.0334	4.3	47	185	26	78
47	142.025	38.8779	4.4	47	18	72	115
48	141.917	38.8981	4.2	47	204	20	93
49	141.885	39.0144	4.3	47	175	17	64
50	142.173	38.9493	4.3	47	29	66	88
51	141.704	38.9259	4.3	47	201	17	91
52	142.108	38.8586	4.6	47	208	21	99
53	142.222	38.9246	4.6	50	357	69	71
54	142.316	39.0887	4.4	50	185	23	75
55	142.114	38.8556	4.8	50	188	18	78
56	142.122	38.9269	4.6	50	264	77	-123
57	142.217	38.8975	4.8	50	203	52	97
58	142.634	38.6887	4.7	50	191	19	81
59	142.052	38.8254	4.4	50	190	22	84
60	142.284	38.856	4.1	50	173	19	64
61	142.217	39.0671	4.3	53	179	24	70
62	141.825	39.2642	4.5	53	189	19	77
63	142.521	38.7824	4.3	53	163	30	93
64	142.408	38.8225	4.5	53	198	45	100
65	142.204	38.8907	4.3	53	202	18	97
66	142.824	38.8698	4.6	59	239	62	-165
67	141.792	39.2222	4.7	62	252	46	-118
70	142.285	39.595	5	71	213	75	-97
Intermediate Depths (70-200 km) subvolum:Rb2
68	141.869	38.6898	4.6	65	55	42	153
69	141.732	39.1433	4.5	71	302	61	-25
71	141.593	38.8162	4.2	71	248	69	54
72	141.66	38.9677	4.2	71	193	60	87
73	141.791	38.1868	4.2	71	236	43	125
74	141.571	38.539	4.3	71	233	61	-159
75	141.573	38.8653	4.4	74	12	35	92
76	141.512	39.6638	4.3	74	88	46	166
77	141.728	40.0397	4.2	74	186	71	56
78	141.593	38.7615	4.9	74	73	25	145
79	141.595	38.8682	4.6	77	189	63	86
80	141.605	38.8552	4.6	77	190	55	90
81	141.614	38.9662	4.8	80	73	47	149
82	141.586	39.6303	4	83	178	57	69
83	141.589	38.9068	4.8	83	183	55	67
84	140.964	38.6272	4.3	89	12	25	111
85	141.108	39.3962	5.6	92	19	83	-89
86	141.161	39.5953	5.2	95	243	55	56
89	140.465	39.5323	4.5	140	270	25	-5
Intermediate Depths (70-200 km) subvolum:Rb3
87	141.735	39.164	4.5	107	121	44	-101
88	141.475	38.6953	4.6	107	270	25	-5
90	140.618	39.28	4.4	135	357	20	-77
91	140.712	39.3565	4.5	140	25	22	-55
92	140.487	39.156	4.3	145	25	16	-55
93	140.768	39.7615	4.9	155	333	51	-106
94	139.818	39.5215	4.4	170	331	27	-68
95	140.043	40.619	4.3	185	46	29	-77
96	139.486	40.1488	4.7	195	103	47	-158

## Sheet: Northern Izu-Bonin Trench WBZ
Northern Izu-Bonin Trench WBZ
The trench-outer rise subvolum:Rc0
Number	Longitude(°)	Latitude(°)	Magnitude(Mw)	Depth(km)	Strike(°)	Dip(°)	Rake(°)
7	142.51	33.0035	4.6	5	15	40	-59
11	142.081	33.5392	5.1	5	358	43	-67
12	142.326	33.014	5.2	5	352	26	-60
14	142.358	32.8542	4.5	8	3	32	-55
16	142.542	33.2093	5.2	11	7	47	-57
Shallow Depths (0-70 km) subvolum:Rc1
1	141.913	32.7662	4.8	5	11	37	128
2	141.976	32.7418	4.4	5	14	37	137
3	141.891	33.3012	4.5	5	35	38	114
4	141.916	32.5453	4.6	5	21	46	126
5	141.673	33.0382	4.4	5	118	29	15
6	141.21	33.5983	4.6	5	179	21	118
8	141.828	33.0898	4.6	5	320	55	65
9	141.885	33.165	4.7	5	329	65	69
10	141.824	33.1108	4.4	5	32	43	125
13	141.718	32.9413	4.4	8	142	38	50
15	130.756	32.6818	4.6	8	208	34	-139
17	141.146	33.5252	4.4	32	256	36	-149
18	140.232	32.7518	4.6	32	158	51	153
19	140.729	33.3533	4.4	35	239	83	148
20	141.065	33.504	4.4	38	185	30	82
21	141.061	33.5012	4.6	41	203	43	106
22	141.074	33.4963	4.3	41	8	58	93
23	141.061	33.4977	4.8	41	8	47	81
24	141.146	33.5308	4.9	41	314	67	17
25	141.042	33.5338	5.8	41	356	43	74
26	141.161	32.8128	4.6	47	71	32	147
27	140.823	33.4307	4.3	50	322	56	35
28	140.864	33.2042	4.5	50	192	32	91
29	140.84	33.2102	4.3	53	334	41	68
30	140.867	33.5065	4.6	53	196	42	127
31	141.149	33.5388	4.3	56	241	22	-169
32	140.811	33.1557	4.7	56	206	35	107
33	140.789	33.2715	4.9	56	200	32	135
34	140.486	33.5365	4.6	62	149	20	-4
35	140.647	33.0508	4.2	65	14	24	98
36	140.729	32.8543	4.3	65	91	42	163
37	140.777	32.9127	5.7	68	16	19	76
Intermediate Depths (70-300 km) subvolum:Rc2
38	140.71	32.8953	4.6	71	175	88	96
39	140.588	33.0882	4.2	77	282	60	60
40	140.854	33.5438	4.5	83	158	84	-85
41	139.946	33.239	5.1	104	87	28	166
42	140.223	33.0853	4.5	122	291	32	-174
43	140.055	33.0557	4.4	130	20	82	23
44	140.008	32.9928	4.3	130	193	86	-9
45	139.356	33.2767	4.3	160	209	82	113
46	139.259	32.832	4.9	195	139	37	-158
47	139.249	32.8568	4.3	210	126	22	169
Deep Depths (300-500 km) subvolum:Rc3
48	138.196	33.2817	4.1	320	71	36	155
49	138.312	33.196	4.3	320	52	26	133
50	138.366	33.5147	4.5	320	9	12	88
51	138.541	33.2055	4.1	340	285	7	119
52	138.116	33.27	4.2	340	320	27	50
53	138.36	32.7343	4.2	360	158	20	-153
54	137.934	33.1225	4	360	185	54	85
55	137.979	33.2767	4.4	360	183	81	41
56	138.092	33.241	4.9	360	197	78	129
57	138.231	33.1183	4.1	360	225	62	75
58	138.065	33.053	4.3	360	94	26	162
59	137.768	33.2577	4.3	360	80	32	147
60	137.916	33.0153	4.1	360	15	12	92
61	137.402	33.1475	4	400	83	32	167
62	136.16	33.0817	4.4	420	45	59	168
